# Supplementary material for: Investigation of Antifungal Mechanisms of Thymol in the Human Fungal Pathogen, Cryptococcus neoformans
Source: MDPI journal article supplement (doi:10.3390/molecules26113476), 2021-06-07
Supplement: s1 [file s1]

**Table S1. Strains used in this study**

| Strain  | Genotype                                                                                        | Parent | Reference  |
|---------|-------------------------------------------------------------------------------------------------|--------|------------|
| H99     | <i>MAT<math>\alpha</math></i>                                                                   |        | [1]        |
| YSB64   | <i>MAT<math>\alpha</math> hog1<math>\Delta</math>::NAT-STM#177</i>                              | H99    | [2]        |
| YSB42   | <i>MAT<math>\alpha</math> cac1<math>\Delta</math>::NAT-STM#159</i>                              | H99    | [3]        |
| YSB53   | <i>MAT<math>\alpha</math> ras1<math>\Delta</math>::NAT-STM#150</i>                              | H99    | [3]        |
| KK1     | <i>MAT<math>\alpha</math> cna1<math>\Delta</math>::NAT-STM#117</i>                              | H99    | [4]        |
| KK2     | <i>MAT<math>\alpha</math> cnb1<math>\Delta</math>::NAT-STM#117</i>                              | H99    | [4]        |
| KK3     | <i>MAT<math>\alpha</math> mpk1<math>\Delta</math>::NAT-STM#150</i>                              | H99    | [4]        |
| YSB552  | <i>MAT<math>\alpha</math> ire1<math>\Delta</math>::NAT-STM#224</i>                              | H99    | [5]        |
| YSB723  | <i>MAT<math>\alpha</math> hxl1<math>\Delta</math>::NAT-STM#295</i>                              | H99    | [5]        |
| YSB3785 | <i>MAT<math>\alpha</math> rad53<math>\Delta</math>::NAT-STM#184</i>                             | H99    | [6]        |
| YSB1263 | <i>MAT<math>\alpha</math> crz1<math>\Delta</math>::NAT-STM#231</i>                              | H99    | [7]        |
| KW308   | <i>MAT<math>\alpha</math> ire1<math>\Delta</math>::NAT-STM#224 hxl1<math>\Delta</math>::NEO</i> | YSB552 | [8]        |
| KW309   | <i>MAT<math>\alpha</math> ire1<math>\Delta</math>::NAT-STM#224 hxl1<math>\Delta</math>::NEO</i> | YSB552 | [8]        |
| KW610   | <i>MAT<math>\alpha</math> cna1<math>\Delta</math>::NAT-STM#117 ire1<math>\Delta</math>::NEO</i> | KK1    | This study |
| KW611   | <i>MAT<math>\alpha</math> cna1<math>\Delta</math>::NAT-STM#117 ire1<math>\Delta</math>::NEO</i> | KK1    | This study |
| KW614   | <i>MAT<math>\alpha</math> cnb1<math>\Delta</math>::NAT-STM#117 ire1<math>\Delta</math>::NEO</i> | KK2    | This study |
| KW615   | <i>MAT<math>\alpha</math> cnb1<math>\Delta</math>::NAT-STM#117 ire1<math>\Delta</math>::NEO</i> | KK2    | This study |
| KW629   | <i>MAT<math>\alpha</math> cna1<math>\Delta</math>::NAT-STM#117 hog1<math>\Delta</math>::NEO</i> | KK1    | This study |
| KW632   | <i>MAT<math>\alpha</math> cna1<math>\Delta</math>::NAT-STM#117 hog1<math>\Delta</math>::NEO</i> | KK1    | This study |
| KW630   | <i>MAT<math>\alpha</math> cnb1<math>\Delta</math>::NAT-STM#117 hog1<math>\Delta</math>::NEO</i> | KK2    | This study |
| KW637   | <i>MAT<math>\alpha</math> cnb1<math>\Delta</math>::NAT-STM#117 hog1<math>\Delta</math>::NEO</i> | KK2    | This study |
| KW638   | <i>MAT<math>\alpha</math> cnb1<math>\Delta</math>::NAT-STM#117 hog1<math>\Delta</math>::NEO</i> | KK2    | This study |
| KW986   | <i>MAT<math>\alpha</math> cna1<math>\Delta</math>::NAT-STM#117 crz1<math>\Delta</math>::NEO</i> | KK1    | This study |
| KW1009  | <i>MAT<math>\alpha</math> cna1<math>\Delta</math>::NAT-STM#117 crz1<math>\Delta</math>::NEO</i> | KK1    | This study |
| KW1010  | <i>MAT<math>\alpha</math> cna1<math>\Delta</math>::NAT-STM#117 crz1<math>\Delta</math>::NEO</i> | KK1    | This study |
| KW987   | <i>MAT<math>\alpha</math> cnb1<math>\Delta</math>::NAT-STM#117 crz1<math>\Delta</math>::NEO</i> | KK2    | This study |
| KW1011  | <i>MAT<math>\alpha</math> cnb1<math>\Delta</math>::NAT-STM#117 crz1<math>\Delta</math>::NEO</i> | KK2    | This study |
| KW1012  | <i>MAT<math>\alpha</math> cnb1<math>\Delta</math>::NAT-STM#117 crz1<math>\Delta</math>::NEO</i> | KK2    | This study |
| KW753   | <i>MAT<math>\alpha</math> CPY-4xFLAG-NEO</i>                                                    | H99    | This study |
| KW754   | <i>MAT<math>\alpha</math> CPY-4xFLAG-NEO</i>                                                    | H99    | This study |
| KW755   | <i>MAT<math>\alpha</math> CPY-4xFLAG-NEO</i>                                                    | H99    | This study |

Each NAT-STM# indicates the Nat<sup>r</sup> marker with a unique signature tag.

## References

- [1] J.R. Perfect, N. Ketabchi, G.M. Cox, C.W. Ingram, C.L. Beiser, Karyotyping of *Cryptococcus neoformans* as an epidemiological tool, J. Clin. Microbiol. 31 (1993) 3305-3309.
- [2] Y.S. Bahn, K. Kojima, G.M. Cox, J. Heitman, Specialization of the HOG pathway and its impact on differentiation and virulence of *Cryptococcus neoformans*, Mol Biol Cell 16 (2005) 2285-2300.

- [3] Y.S. Bahn, J.K. Hicks, S.S. Giles, G.M. Cox, J. Heitman, Adenylyl cyclase-associated protein Aca1 regulates virulence and differentiation of *Cryptococcus neoformans* via the cyclic AMP-protein kinase A cascade, *Eukaryot Cell* 3 (2004) 1476-1491.
- [4] K. Kojima, Y.S. Bahn, J. Heitman, Calcineurin, Mpk1 and Hog1 MAPK pathways independently control fludioxonil antifungal sensitivity in *Cryptococcus neoformans*, *Microbiology* 152 (2006) 591-604.
- [5] S.A. Cheon, K.W. Jung, Y.L. Chen, J. Heitman, Y.S. Bahn, H.A. Kang, Unique evolution of the UPR pathway with a novel bZIP transcription factor, Hxl1, for controlling pathogenicity of *Cryptococcus neoformans*, *PLoS Pathog.* 7 (2011) e1002177.
- [6] K.T. Lee, Y.S. So, D.H. Yang, K.W. Jung, J. Choi, D.G. Lee, H. Kwon, J. Jang, L.L. Wang, S. Cha, G.L. Meyers, E. Jeong, J.H. Jin, Y. Lee, J. Hong, S. Bang, J.H. Ji, G. Park, H.J. Byun, S. Park, Y.M. Park, G. Adedoyin, T. Kim, A.K. Averette, J.S. Choi, J. Heitman, E. Cheong, Y.H. Lee, Y.S. Bahn, Systematic fungal analysis of kinases in the fungal pathogen *Cryptococcus neoformans*, *Nat Commun* 7 (2016) 12766.
- [7] K.W. Jung, D.H. Yang, S. Maeng, K.T. Lee, Y.S. So, J. Hong, J. Choi, H.J. Byun, H. Kim, S. Bang, M.H. Song, J.W. Lee, M.S. Kim, S.Y. Kim, J.H. Ji, G. Park, H. Kwon, S. Cha, G.L. Meyers, L.L. Wang, J. Jang, G. Janbon, G. Adedoyin, T. Kim, A.K. Averette, J. Heitman, E. Cheong, Y.H. Lee, Y.W. Lee, Y.S. Bahn, Systematic functional profiling of transcription factor networks in *Cryptococcus neoformans*, *Nat Commun* 6 (2015) 6757.
- [8] K.W. Jung, Y.S. So, Y.S. Bahn, Unique roles of the unfolded protein response pathway in fungal development and differentiation, *Sci Rep* 6 (2016) 33413.
