# Supplementary material for: Investigation of Antifungal Mechanisms of Thymol in the Human Fungal Pathogen, Cryptococcus neoformans
Source: MDPI journal article supplement (doi:10.3390/molecules26113476), 2021-06-07
Supplement: s1 [file s1]

**Table S2. Primers used in this study**

| Primer Name | Sequence (5' - 3')                       | Comment                                        |
|-------------|------------------------------------------|------------------------------------------------|
| B79         | TGTGGATGCTGGCGGAGGATA                    | Screening primer on <i>ACT1</i> promoter       |
| J12579      | TCCCCACCCTCAGCAACGCC                     | Screening primer on <i>TRP1</i> terminator     |
| B1026       | GTA AACGACGCGCCAGTGAGC                   | M13 forward (extended)                         |
| B1027       | CAGGAAACAGCTATGACCATG                    | M13 reverse (extended)                         |
| B1886       | TGGAAGAGATGGATGTGC                       | NEO-NSL2                                       |
| B1887       | ATTGTCTGTTGTGCCAG                        | NEO-NSR2                                       |
| B1648       | AGGAATACGAGGTTTATCGG                     | <i>IRE1</i> – 5' screening primer              |
| B1644       | GCCCCATCATATAATCAC                       | <i>IRE1</i> – left flanking primer 1           |
| B1645       | GCTCACTGGCCGTCGTTTACACTATGTGCCATCTGAGGC  | <i>IRE1</i> – left flanking primer 2           |
| B1646       | CATGGTCATAGCTGTTTCTGAGTGAGTTGAGGGAGGAAAG | <i>IRE1</i> – right flanking primer 1          |
| B1647       | GAAGAAGAGCGTCAAGAAGG                     | <i>IRE1</i> – right flanking primer 2          |
| B1683       | AGCATTAGGGGTGTAGGTG                      | <i>IRE1</i> – probe primer 1 for Southern blot |
| J844        | AAATCGTCCGTGAAGTCGCAGG                   | <i>HOG1</i> – 3' screening primer              |
| J839        | TGTGGTAGGTGCGTTATCG                      | <i>HOG1</i> – left flanking primer 1           |
| J840        | TCACTGGCCGTCGTTTACAGAAAGCCATCCATCAG      | <i>HOG1</i> – left flanking primer 2           |
| J841        | CATGGTCATAGCTGTTTCTGTCTTGTAAGTCTCTGTGCC  | <i>HOG1</i> – right flanking primer 1          |
| J842        | TACTCAACCCATACTCACTCCCG                  | <i>HOG1</i> – right flanking primer 2          |
| J845        | AATCAACACCTCGGCGGCAAC                    | <i>HOG1</i> – probe primer 1 for Southern blot |
| B5251       | CACTCCATTCTTTCTGC                        | RT-PCR primer L1 for <i>HXL1</i>               |
| B5252       | CGTAACTCCACTGTGTCC                       | RT-PCR primer R1 for <i>HXL1</i>               |
| C51         | CTTCCAGCCTTCTCTCCTTG                     | RT-PCR primer L1 for <i>ACT1</i>               |
| C52         | AGAGGTCCTTCTGATGTCG                      | RT-PCR primer R1 for <i>ACT1</i>               |
| C53         | CTCTGAGGACGACAAGGACA                     | qRT primer 1 for <i>KAR2</i>                   |
| C54         | AGCTCAGAAAGCTGCTCCTC                     | qRT primer 2 for <i>KAR2</i>                   |
| J846        | GTCGCTATCCAGGGACATT                      | qRT primer 1 for <i>ALG7</i>                   |
| J847        | GTCCAAAGAGTTGAGGGCAT                     | qRT primer 2 for <i>ALG7</i>                   |
| J848        | GCATTGGTTACGGTCTCCTT                     | qRT primer 1 for <i>ERV29</i>                  |
| J849        | GCAAAGAGTCGGAGAGAACC                     | qRT primer 2 for <i>ERV29</i>                  |
| J850        | CTCGTACGCTGTGCTTGATT                     | qRT primer 1 for <i>PMT1</i>                   |
| J851        | CCGAGCTCATAAACCCATCT                     | qRT primer 2 for <i>PMT1</i>                   |
| J852        | TTCTTTCACCTTGGTCTTCG                     | qRT primer 1 for <i>PMT2</i>                   |
| J853        | CAAGCTGACAGTTGAGAACC                     | qRT primer 2 for <i>PMT2</i>                   |
| J854        | ACAATGCGGGTCTTACTTCC                     | qRT primer 1 for <i>PMT4</i>                   |
| J855        | TGCTGACCCTCATTACGTGT                     | qRT primer 2 for <i>PMT4</i>                   |
| J61         | TTCCCGCTCACTTCAATC                       | qRT primer 1 for <i>ERG1</i>                   |
| J62         | AGGAAGACCCTGGATGGAG                      | qRT primer 2 for <i>ERG1</i>                   |
| J1340       | ACGGTGTTGAAGACGACAG                      | qRT primer 1 for <i>HMG1</i>                   |
| J1341       | CCGCGTGAGCGTTAAATC                       | qRT primer 2 for <i>HMG1</i>                   |
| B677        | AATCTCCTTACCAGCCATTTCGG                  | qRT primer 1 for <i>ERG11</i>                  |
| B678        | TTCAGGGAACCTGGGAACAGC                    | qRT primer 2 for <i>ERG11</i>                  |
| J732        | GCGGCCGCAAGGAAAGGAAACAGAACT              | Primer 1 for <i>CPYPE</i> (CNAG_06640)         |
| J733        | ggatccCTCGTCTTCAGCAGCAGCC                | Primer 2 for <i>CPYPE</i> (CNAG_06640)         |
| J734        | ACTTACCGCCTTCTTCGTC                      | Primer 1 for <i>CPYPE</i> sequencing           |
| J735        | CTTGCTCTCTCAACCCTG                       | Primer 2 for <i>CPYPE</i> sequencing           |
| J736        | CCAACATTGCCAGCGTAC                       | Primer 3 for <i>CPYPE</i> sequencing           |

|       |                                          |                                       |
|-------|------------------------------------------|---------------------------------------|
| J875  | GACAAGTCTCCCGAGAAGG                      | Primer 4 for <i>CPYPE</i> sequencing  |
| J737  | ggatccGGCGCGCCAGATTACAAGGA               | Primer 1 for 4xFLAG tagging           |
| J738  | TTAGTCGACCTTATCGTCGTC                    | Primer 2 for 4xFLAG tagging           |
| J739  | GACGACGATAAGGTCGACTAATGGTAACTTTGTGATATTT | Primer 1 for <i>CPYt</i> (CNAG_06640) |
| J740  | ggatccGGCGCGCCAGAGAAGGCGTACGGCTCG        | Primer 2 for <i>CPYt</i> (CNAG_06640) |
| J399  | ACCAACGGCTGTACCTCTG                      | qRT primer 1 for <i>SOD1</i>          |
| J400  | ATATTACCGAGGTCACCAACG                    | qRT primer 2 for <i>SOD1</i>          |
| J401  | CAAGGCCACCAAGAAGCTC                      | qRT primer 1 for <i>SOD2</i>          |
| J402  | TAGAAAGCGTGCTCCAG                        | qRT primer 2 for <i>SOD2</i>          |
| J403  | TTATTCACGCGGTAAGGGAG                     | qRT primer 1 for <i>CAT1</i>          |
| J404  | GAAATCTCCAGGCAAGCAAG                     | qRT primer 2 for <i>CAT1</i>          |
| J405  | ACCGAGACAACGGATGAGG                      | qRT primer 1 for <i>CAT2</i>          |
| J406  | TGACACGAGACATTGGTGATC                    | qRT primer 2 for <i>CAT2</i>          |
| J407  | TGCCTTCGTATCCAAGCTC                      | qRT primer 1 for <i>CAT3</i>          |
| J408  | ATTGCGTAGCATTGCCGAC                      | qRT primer 2 for <i>CAT3</i>          |
| J409  | ATCGCCTGATCTTGAGC                        | qRT primer 1 for <i>CAT4</i>          |
| J410  | CGCCAAAGCCATTATGAGTAC                    | qRT primer 1 for <i>CAT4</i>          |
| J389  | GCCACTCAAGACTGATCCTAC                    | qRT primer 1 for <i>SRX1</i>          |
| J390  | CGTTTCCATCCCAGTCTC                       | qRT primer 1 for <i>SRX1</i>          |
| B679  | CGCCCTTGCTCCTTCTTCTATG                   | qRT primer 1 for <i>ACT1</i>          |
| B680  | GACTCGTCGTATTGCTCTTCG                    | qRT primer 2 for <i>ACT1</i>          |
| J1178 | CGTTGGTAATGCAGCCGAG                      | qRT primer 1 for <i>VCX1</i>          |
| J1179 | AAGGCGATTGGATCGAGG                       | qRT primer 2 for <i>VCX1</i>          |
| J1180 | CCATGCTGATGATGCTTGC                      | qRT primer 1 for <i>CCH1</i>          |
| J1181 | TGTGACTCTTTCGGTCTTGG                     | qRT primer 2 for <i>CCH1</i>          |
| J1182 | GCTTGGTGGTCGTGATTG                       | qRT primer 1 for <i>PMC1</i>          |
| J1183 | CAAGAAGTCGGGCAAATGG                      | qRT primer 2 for <i>PMC1</i>          |
| J1184 | CCGTCGAGGAGGGTAAATC                      | qRT primer 1 for <i>PMR1</i>          |
| J1185 | GGTTGAGAGGTGATGAGG                       | qRT primer 2 for <i>PMR1</i>          |
| J1186 | GGCTGTGCAACTGTATTTGG                     | qRT primer 1 for <i>ECA1</i>          |
| J1187 | ACAGAGGAGCATTGGTGG                       | qRT primer 2 for <i>ECA1</i>          |
